# Supplementary material for: A Chinese Herbal Decoction, Modified Yi Guan Jian, Induces Apoptosis in Hepatic Stellate Cells through an ROS-Mediated Mitochondrial/Caspase Pathway
Source: PubMed Central journal article supplement (PMC2957151; doi:10.1155/2011/459531), 2010-09-26
Supplement: 459531.f1.pdf [file 459531.f1.pdf]

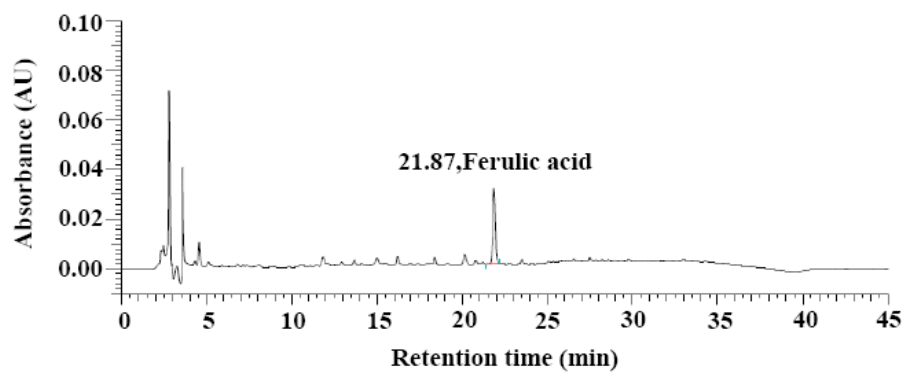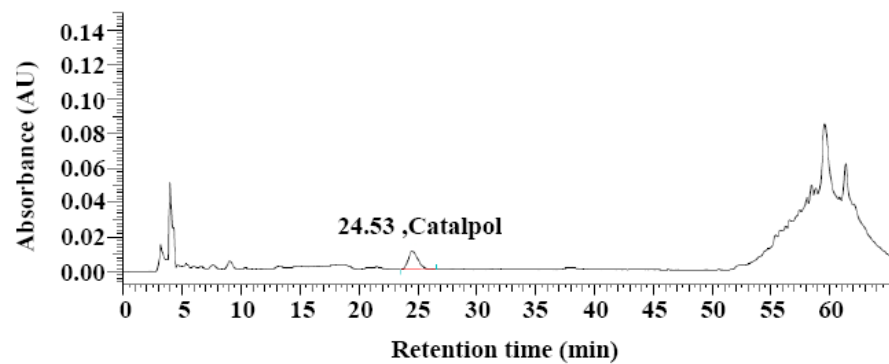

Supplemental Figure 1.  
Lin *et al.* ↑
